# Supplementary material
Source: PubMed Central journal article supplement (PMC2836608)
Supplement: 0905796107_pnas.0905796107_SI.pdf [file 0905796107_pnas.0905796107_SI.pdf]

# Supporting Information

Guzmán et al. 10.1073/pnas.0905796107

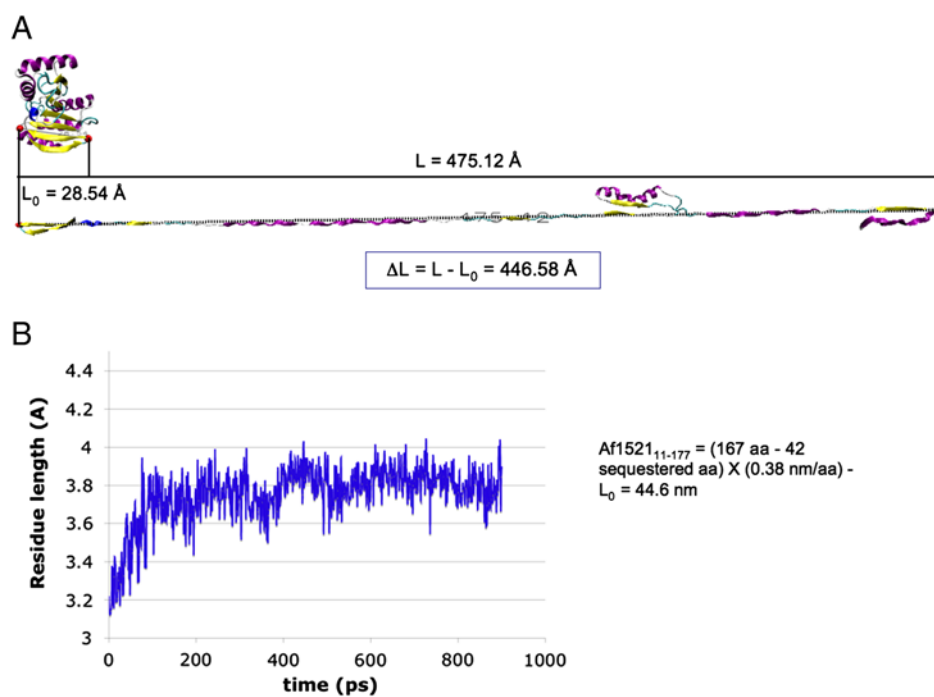

**Fig. S1.** Calculating contour length of Af1521<sub>11-177</sub> from simulations. (A) Distance between anchoring residues of folded protein  $L_0$  and the length of unfolded protein with intact disulfide C104–C147 (sequestering 42 residues)  $L$ ; (B) plot of the length of a single residue over time shows the average length at 3.8 Å, which was used in calculating the contour length of the protein.







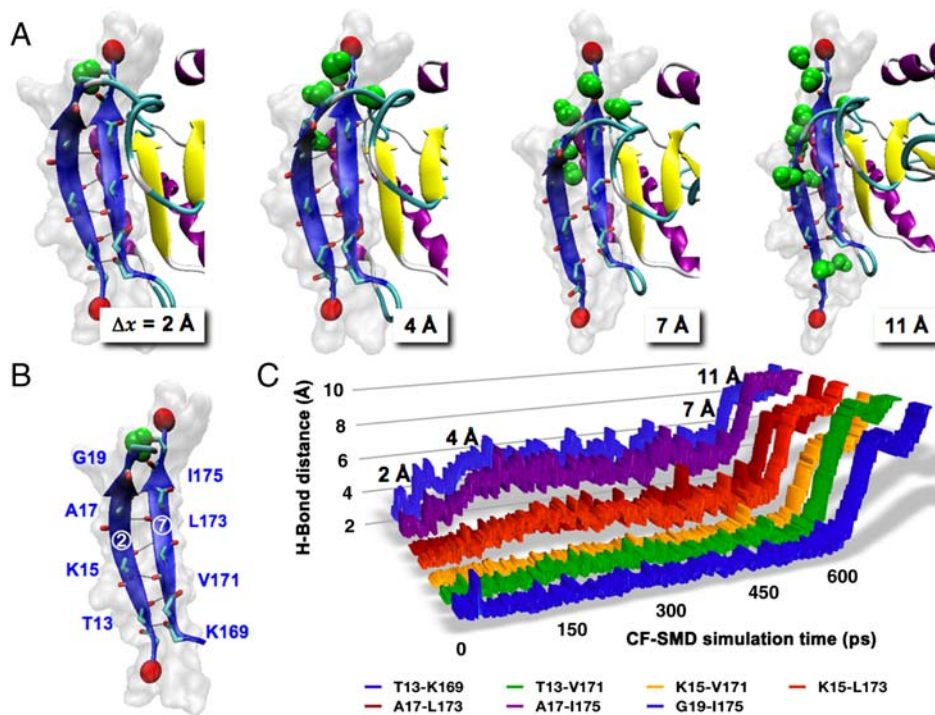

**Fig. S7.** CF-1000-1 trajectory analysis for  $-\beta\text{Af1521}_{11-177}$ . (A) Representative snapshots illustrating water interaction with bond-breaking events between strands 2 and 7 at  $\Delta x = 2\text{--}11 \text{ \AA}$ ; water molecules are shown in green; (B) load-bearing strands depicting amino acids; and (C) distance-time plot of the seven load-bearing H bonds.

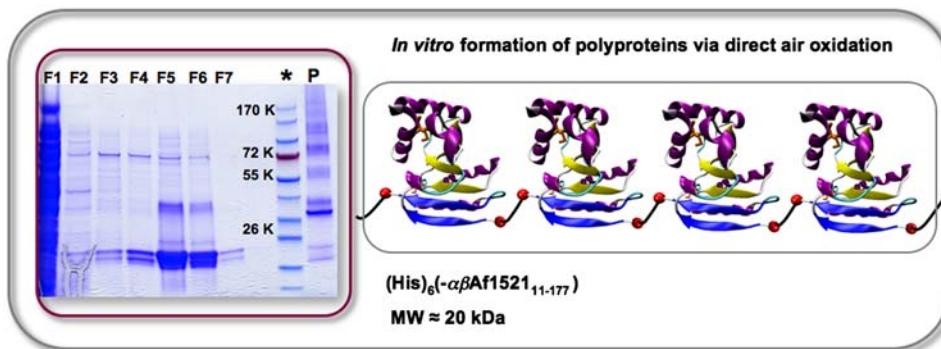

**Fig. S8.** Cysteine engineering of polyprotein  $(-\beta\text{Af1521}_{11-177})_n$ . SDS-PAGE analysis showing fractions (F1, F2, etc.) from nickel-affinity purification, which already exhibits growing chains of the polyprotein. The molecular weight of the protein is  $\sim 20 \text{ kDa}$ . The asterisks (\*) indicate the molecular weight ladder, and P is the polyprotein after  $\sim 80 \text{ hr}$  of exposure to air at room temperature.
